# Supplementary material for: Polysaccharides from Radix Peucedani: Extraction, Structural Characterization and Antioxidant Activity
Source: MDPI journal article supplement (doi:10.3390/molecules28237845), 2023-11-29
Supplement: s1 [file s1]

## Supplementary Materials

Polysaccharides from Radix *Peucedani*: Extraction, Structural Characterization and Antioxidant Activity

Jie Zhang, Chenyue Wang, Qian Li \* and Wei Liang

State Key Laboratory of Aridland Crop Science, College of Agronomy, Gansu Agricultural University, Lanzhou 730070, China; jie.zhang101@icloud.com (J.Z.); wcy04042023@163.com (C.W.); liangw@gsau.edu.cn (W.L.)

\* Correspondence: liqian1984@gsau.edu.cn

## S1. Materials and methods

## S1.1. Preparation of DESs

The hydrogen bond acceptor (choline chloride and anhydrous betaine) and hydrogen bond donor (xylitol, 1, 2-propanediol glycol, urea, lactic acid, citric acid) were mixed according to table 1 and placed in a conical flask with a magnetic stirrer. The reactions were maintained at a temperature of 80 °C and stirred for 40 min until the solution entered a transparent state. It was left sealed at room temperature for one week; the liquid was still homogeneous and transparent.

S1.2. Extraction of Radix *Peucedani* polysaccharides

Method 1 (ultrasound-assisted DESs): 1 g of the pretreated Radix *Peucedani* powder was weighed and added to 20 mL of different DES solvents. The sonication time was 30 min, power 240W, temperature 45 °C and water content 30%. After centrifugation at 12,000 rpm for 10 min, the supernatant was collected in a 25 mL volumetric flask. Radix *Peucedani* polysaccharides powder were obtained (RPP).

Method 2 (decoction piece): 1 g of Radix *Peucedani* decoction pieces was weighed and added to 20 mL of distilled water. It was extracted using a magnetic stirrer 800 rpm in boiling water for 30 min, and the extraction was repeated twice. The extracts were combined and treated by deproteinization and left to be measured.

Method 3 (ultrasonic water extraction): 1 g of the pretreated Radix *Peucedani* powder was weighed and added to 20 mL of distilled water. The sonication time was 30 min, power 240 W, temperature 45 °C. The supernatant was deproteinized and left to be measured.

Method 4 (distilled water extraction): 1 g of the pretreated Radix *Peucedani* powder was weighed and added to 20 mL of distilled water. Using a magnetic stirrer 800 rpm, cold water extraction for 30 min. The supernatant was deproteinized and left to be measured.

Method 5 (hot water reflux): 1 g of the pretreated Radix *Peucedani* powder was weighed and added to 20 mL of distilled water and extracted by hot reflux at 45 °C for 30 min. The supernatant was deproteinized and left to be measured.

Method 6 (thermal extraction): 1 g of the pretreated Radix *Peucedani* powder was weighed and added to 20 mL of distilled water. Use magnetic stirrer 800 rpm, it was heated to 45 °C and hot water extracted for 30 min. The supernatant was deproteinized and left to be measured.

## S1.3. Determination of polysaccharides content

The glucose standard curve was plotted with the polysaccharides concentration as the horizontal coordinate (x) and the measured absorbance as the vertical coordinate (y).

**Citation:** Zhang, J.; Wang, C.; Li, Q.; Liang, W. Polysaccharides from Radix *Peucedani*: Extraction, Structural Characterization and Antioxidant Activity. *Molecules* **2023**, *28*, 7845. <https://doi.org/10.3390/molecules28237845>

Academic Editor: Paola Di Donato

Received: 12 November 2023

Accepted: 27 November 2023

Published: 29 November 2023

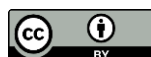

**Copyright:** © 2023 by the authors. Licensee MDPI, Basel, Switzerland. This article is an open access article distributed under the terms and conditions of the Creative Commons Attribution (CC BY) license (<https://creativecommons.org/licenses/by/4.0/>).

Hepreparation of standard curve for glucose standard curve was obtained as regression equation:  $y=0.36194x-0.00176$ ,  $R^2=0.9991$ .

Determination of polysaccharides content in RPP: the polysaccharides content was calculated as described in Equation (1).

$$\text{The yield of RPP (\%)} = \frac{(C \cdot V)}{M} \cdot 100\% \quad (1)$$

In the formula: C is the polysaccharides concentration in the extract; V is the volume of the diluted extract; and M is the mass of the extracted sample.

#### S1.4. Single-factor test

Precisely quantified 1 g of the pretreated Radix *Peucedani* powder and different species of DES were added to the ultrasonic extraction vessel. In order to screen the extraction rate of polysaccharides from Radix *Peucedani*, the extraction rates of polysaccharides from different types of DES were compared. The extraction parameters, including content of water in DES (10, 20, 30, 40 and 50%), extraction time (10, 20, 30, 40 and 50 min), extraction temperature (25, 35, 45, 55 and 65 °C), ultrasonic power (240, 300, 360, 420 and 480W) and solid–liquid ratio (10, 20, 30, 40 and 50 ml ) were optimized to maximize the extraction efficiency.

#### S1.5. Carbohydrate composition

The chromatographic system used a Thermo ICS 5000+ ion chromatography system (ICS 5000+, Thermo Fisher Scientific, USA), and the monosaccharide fractions were analyzed and detected using an electrochemical detector. A Dionex™ CarboPac™ PA20 (150\*3.0 mm, 10 μm) liquid chromatography column was used, and the injection volume was 5 μL. The mobile phase A (H<sub>2</sub>O), mobile phase B (0.1 mol.L<sup>−1</sup> NaOH), mobile phase C (0.1 mol.L<sup>−1</sup> NaOH, 0.2 mol.L<sup>−1</sup> NaAc) were used at a flow rate of 0.5 ml. min<sup>−1</sup>, the column temperature was 30 °C, and the elution gradient was as shown in Table S9 (supporting information).

The 13 kinds of monosaccharide standards were weighed accurately in a 10 mL volumetric flask and added to water to form a 10 mg. mL<sup>−1</sup> standard solution; the appropriate amount of the standardly solution was mixed to form a suitable concentration of the mixing standard.

#### S1.6. Molecular Weight and molecular conformation of monosaccharides

The sample was dissolved in 0.1 mol.L<sup>−1</sup> NaNO<sub>3</sub> aqueous solution (containing 0.02% NaN<sub>3</sub>, w/v) at a final concentration of 1 mg.mL<sup>−1</sup> and filtered through a filter with a pore size of 0.45 μm for on-line detection. A gel exclusion chromatographic column, Ohpak SB-805 HQ (300×8 mm) and Ohpak SB-803 HQ (300×8 mm), was used in series. The column temperature was 45 °C, injection volume was 100 μL, mobile phase (0.02% NaN<sub>3</sub>, 0.1 mol.L<sup>−1</sup> NaNO<sub>3</sub>), flow rate was 0.6 mL. min<sup>−1</sup> and the elution gradient: isocratic 75 min.

#### S1.7. Prediction and intersection of targets

The five polysaccharides fractions contained in Radix *Peucedani* were searched in the Traditional Chinese Medicine Systems Pharmacology Database and Analysis Platform database (TCMSP, <https://old.tcmsp-e.com/tcmsp.php>) and Swiss Target Prediction database (<http://www.swisstargetprediction.ch/>), and the polysaccharides fraction proteins were corrected to standard gene names through the UniProt database (<https://www.uniprot.org/>). A total of 166 target genes were summarized by de-emphasis. The human gene databases GeneCards (<http://www.genecards.org/>), Online Mendelian Inheritance in Man database (OMIM, <https://www.omim.org/>) and PharmGkb (<https://www.pharmgkb.org/>) were searched for target genes related to keyword "Antioxidant". The results of the three databases were combined and de-emphasized; 1,132 disease targets were finally obtained.

**Table S1.** Results of single-factor experiments.

| Single-factor experiments |                              |      |       |       |       |       |
|---------------------------|------------------------------|------|-------|-------|-------|-------|
| Factor 1                  | DESS Water content (%)       | 10   | 20    | 30    | 40    | 50    |
|                           | Yield (%)                    | 8.53 | 10.53 | 9.7   | 9.43  | 8.53  |
| Factor 2                  | Withdrawal times (min)       | 10   | 20    | 30    | 40    | 50    |
|                           | Yield (%)                    | 7.53 | 8.43  | 10.43 | 9.43  | 8.7   |
| Factor 3                  | Ultrasonic power (W)         | 240  | 300   | 360   | 420   | 480   |
|                           | Yield (%)                    | 8.6  | 9.6   | 10.46 | 10.73 | 10.46 |
| Factor 4                  | Extraction temperatures (°C) | 25   | 35    | 45    | 55    | 65    |
|                           | Yield (%)                    | 7.43 | 8.93  | 9.7   | 10.3  | 9.5   |
| Factor 5                  | Material–liquid ratios (%)   | 10   | 20    | 30    | 40    | 50    |
|                           | Yield (%)                    | 8.43 | 8.5   | 10.6  | 9.6   | 9.5   |

**Table S2.** The Box–Behnken design with independent variables and observed values of the extraction yield of polysaccharides from *Radix Peucedani*.

| No. | Factor |         |        | RPP yield /% |
|-----|--------|---------|--------|--------------|
|     | A (%)  | B (min) | C (°C) |              |
| 1   | -1     | 1       | 0      | 9.4526       |
| 2   | 1      | -1      | 0      | 6.82968      |
| 3   | 0      | 0       | 0      | 10.8252      |
| 4   | 0      | 0       | 0      | 11.1382      |
| 5   | 1      | 0       | -1     | 6.67652      |
| 6   | -1     | -1      | 0      | 9.1228       |
| 7   | 1      | 0       | 1      | 9.1487       |
| 8   | -1     | 0       | 1      | 9.3245       |
| 9   | 0      | 0       | 0      | 11.3843      |
| 1   | 0      | 1       | 1      | 9.8011       |
| 11  | 0      | 0       | 0      | 11.1325      |
| 12  | 0      | -1      | -1     | 7.3368       |
| 13  | 0      | -1      | 1      | 9.6268       |
| 14  | -1     | 0       | -1     | 9.9403       |
| 15  | 1      | 1       | 0      | 10.0836      |
| 16  | 0      | 0       | 0      | 10.9668      |
| 17  | 0      | 1       | -1     | 10.8446      |

**Table S3.** Molecular structural characteristic parameters of RPP.

| Parameters               | RPP   |            |
|--------------------------|-------|------------|
| Molecular weight (g/mol) | Mw    | 3.528x103  |
|                          | Mn    | 9.82x102   |
|                          | Mz    | 3.2960x104 |
| Polydispersity           | MW/Mn | 3.591      |
|                          | Mz/Mn | 33.546     |
| RMS radius moments (nm)  | Rw    | 76.9       |
|                          | Rn    | 83.2       |
|                          | Rz    | 80.1       |

**Table S4.** Monosaccharide composition and content.

| Monosaccharide name | Test results(ug/mg) | Percentage(%) | Mole–mass ratio(%) |
|---------------------|---------------------|---------------|--------------------|
| Fuc                 | 0                   | 0.00%         | 0.00%              |

|        |         |        |        |
|--------|---------|--------|--------|
| Rha    | 0.6596  | 1.54%  | 1.68%  |
| Ara    | 3.8281  | 8.94%  | 10.64% |
| Gal    | 2.7349  | 6.38%  | 6.33%  |
| Glc    | 28.8934 | 67.45% | 66.91% |
| Xyl    | 0       | 0.00%  | 0.00%  |
| Man    | 0       | 0.00%  | 0.00%  |
| Fru    | 0       | 0.00%  | 0.00%  |
| Rib    | 0       | 0.00%  | 0.00%  |
| Gal-UA | 6.7235  | 15.69% | 14.45% |
| Gul-UA | 0       | 0.00%  | 0.00%  |
| Glc-UA | 0       | 0.00%  | 0.00%  |
| Man-UA | 0       | 0.00%  | 0.00%  |

Table S5. Binding energies of the key polysaccharides fraction to the core targets.

| Chemical compound | MAPK1 /kJ·mol <sup>-1</sup> | CASP3 /kJ·mol <sup>-1</sup> | IL1B /kJ·mol <sup>-1</sup> |
|-------------------|-----------------------------|-----------------------------|----------------------------|
| Glucose           | -3.19                       | -3.51                       | -3.74                      |
| Galactose         | -0.8                        | -1.79                       | -1.74                      |

Table S6. All reagents used in the experiment.

| Manufacturer                                                                   | Reagent Name                                                                                                                                                                                                                                                                                                                                                   |
|--------------------------------------------------------------------------------|----------------------------------------------------------------------------------------------------------------------------------------------------------------------------------------------------------------------------------------------------------------------------------------------------------------------------------------------------------------|
| Shanghai McLean Biochemical Science and Technology Co., Ltd. (Shanghai, China) | Choline chloride, betaine anhydrous, xylitol, 1,2-propylene glycol, urea, and lactic acid                                                                                                                                                                                                                                                                      |
| Sinopharm Chemical Reagent Co., Ltd. (Shanghai, China)                         | D-glucose, phenol, sulfuric acid, petroleum ether, trichloroacetic acid, n-butanol, hydrated citric acid, sodium nitrate, 1,1-diphenyl-2-trinitrophenylhydrazine, ethanol, ferrous sulfate, salicylic acid, 30 % hydrogen peroxide, diammonium 2,2'-azino-bis (3-ethylbenzothiazoline-6-sulfonate) (ABTS), potassium persulfate and l (+) - ascorbic acid (VC) |
| Sigma-Aldrich (Shanghai, China)                                                | Fucose, rhamnose, arabinose, galactose, glucose, xylose, mannose, fructose, ribose, galacturonic acid, glucuronic acid, mannuronic acid, glucuronic acid, sodium hydroxide, sodium acetate standard, dimethyl sulfoxide                                                                                                                                        |
| ANPEL (Shanghai, China)                                                        | Trifluoroacetic acid and methanol                                                                                                                                                                                                                                                                                                                              |

Table S7. Composition of deep eutectic solvents (DESs).

| No | HYdrogen bond acceptor | Hydrogen bond donor  | Molar ratio |
|----|------------------------|----------------------|-------------|
| 1  | Choline chloride       | 1,2-Propylene glycol | 1:2         |
| 2  | Choline chloride       | Urea                 | 1: 2        |
| 3  | Choline chloride       | Xylitol              | 1: 1        |
| 4  | Choline chloride       | Lactic acid          | 1: 2        |
| 5  | Choline chloride       | Citric acid          | 2: 1        |
| 6  | Betaine                | 1,2-Propylene glycol | 1: 2        |
| 7  | Betaine                | Urea                 | 1: 2        |
| 8  | Betaine                | Lactic acid          | 1: 2        |
| 9  | Betaine                | Citric acid          | 2: 1        |

Table S8. Response surface test factors and levels.

| Symbol | Independent variable |         |        |
|--------|----------------------|---------|--------|
|        | A (%)                | B (min) | C (°C) |
| -1     | 10                   | 20      | 45     |
| 0      | 20                   | 30      | 55     |
| 1      | 30                   | 40      | 65     |

Table S9. Elution gradients for anion-exchange chromatography.

| Time (min) | Mobile phase A (%) | Mobile phase B (%) | Mobile phase C (%) |
|------------|--------------------|--------------------|--------------------|
| 0          | 95                 | 5                  | 0                  |
| 26         | 85                 | 5                  | 10                 |
| 42         | 85                 | 5                  | 10                 |
| 42.1       | 60                 | 0                  | 40                 |
| 52         | 60                 | 40                 | 0                  |
| 52.1       | 95                 | 5                  | 0                  |
| 60         | 95                 | 5                  | 0                  |

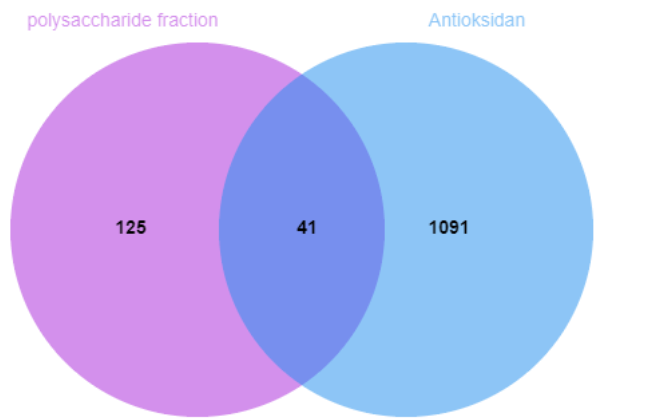

Figure S1. Venn diagram of drug targets and antioxidant targets.

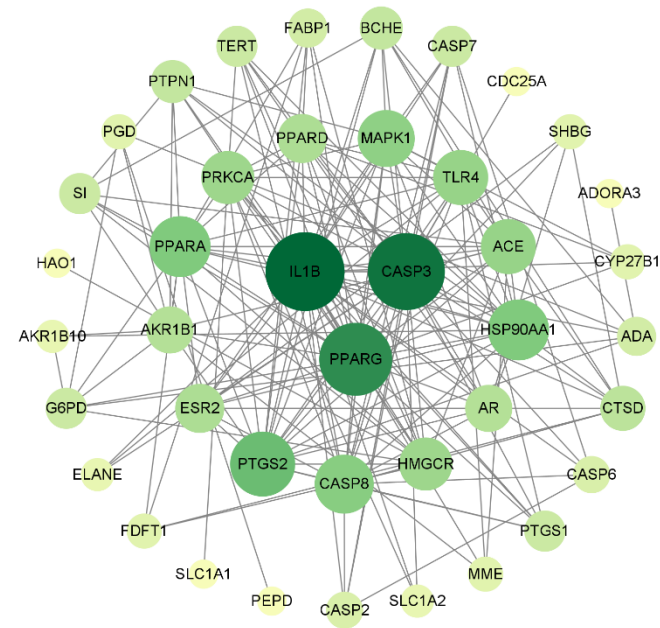

**Figure S2.** Visual PPI network diagram of antioxidant for *Radix Peucedani* polysaccharides.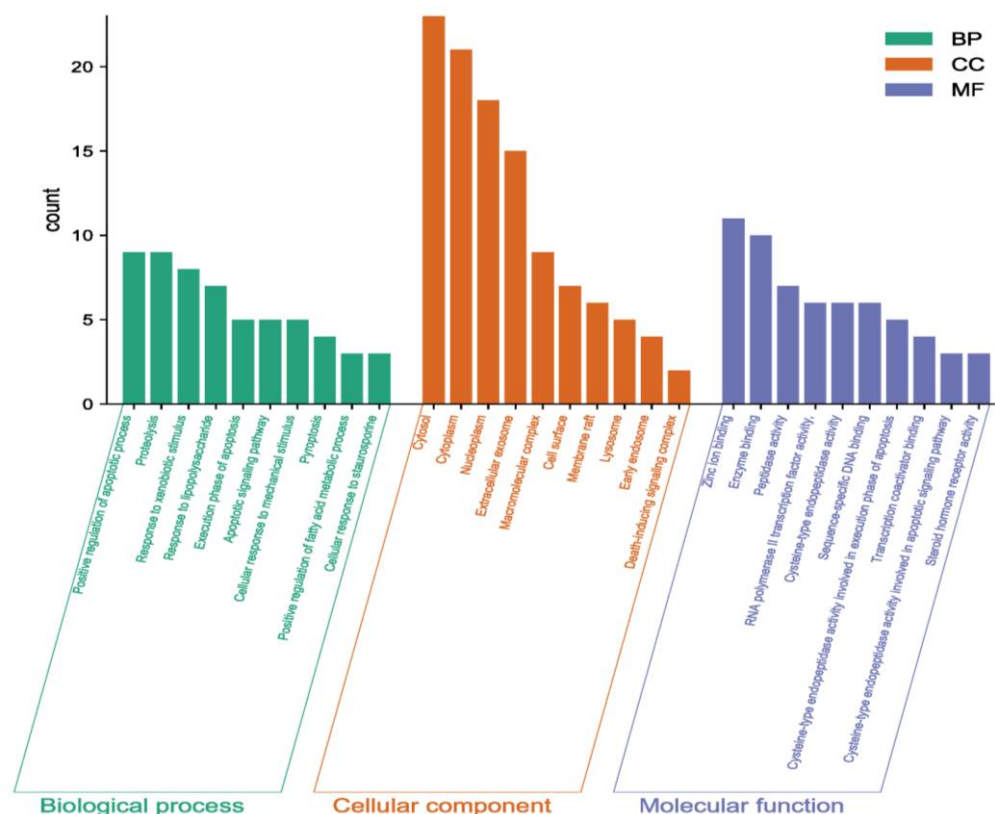**Figure S3.** Analysis diagram of GO functional enrichment.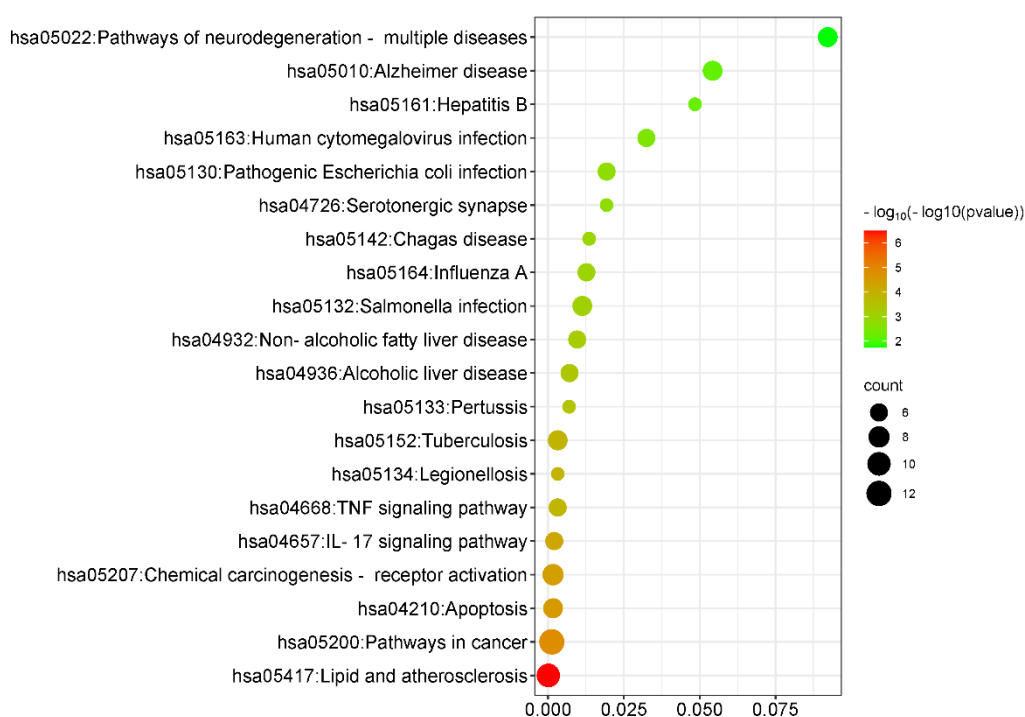**Figure S4.** Enrichment analytic diagram of KEGG pathway.

**Disclaimer/Publisher's Note:** The statements, opinions and data contained in all publications are solely those of the individual author(s) and contributor(s) and not of MDPI and/or the editor(s). MDPI and/or the editor(s) disclaim responsibility for any injury to people or property resulting from any ideas, methods, instructions or products referred to in the content.
